# Supplementary material for: Distribution of Cleaved SNAP-25 in the Rat Brain, following Unilateral Injection of Botulinum Neurotoxin-A into the Striatum
Source: MDPI journal article supplement (doi:10.3390/ijms24021685), 2023-01-14
Supplement: s1 [file s1]

| group | CPu ips  |   |       | CPu con  |   |       | GP ips    |   |       | GP con    |   |       | EP ipsi   |   |       | EP con    |   |       |
|-------|----------|---|-------|----------|---|-------|-----------|---|-------|-----------|---|-------|-----------|---|-------|-----------|---|-------|
|       | mean     | n | SEM   | mean     | n | SEM   | mean      | n | SEM   | mean      | n | SEM   | mean      | n | SEM   | mean      | n | SEM   |
| 2w    | 17.713   | 5 | 1.879 | 6.750    | 5 | 0.547 | 20.814    | 5 | 2.016 | 7.734     | 5 | 0.591 | 18.725    | 5 | 0.743 | 6.512     | 5 | 0.801 |
| 1m    | 17.708   | 4 | 1.603 | 7.061    | 4 | 0.279 | 19.325    | 4 | 2.081 | 8.212     | 4 | 0.984 | 20.130    | 4 | 4.366 | 6.730     | 4 | 0.457 |
| 3m    | 19.672   | 5 | 1.283 | 6.897    | 5 | 1.076 | 22.187    | 5 | 2.065 | 8.357     | 5 | 1.148 | 21.359    | 5 | 6.273 | 6.554     | 5 | 1.293 |
| 6m    | 17.964   | 5 | 2.005 | 8.327    | 5 | 1.433 | 19.395    | 5 | 2.273 | 7.092     | 5 | 1.502 | 19.657    | 5 | 7.078 | 7.039     | 5 | 1.125 |
| 9m    | 13.875   | 5 | 2.23  | 6.893    | 5 | 1.091 | 15.297    | 5 | 2.314 | 7.867     | 5 | 1.486 | 13.649    | 5 | 5.109 | 6.020     | 5 | 1.089 |
| 12m   | 9.589    | 5 | 1.916 | 3.857    | 5 | 0.281 | 10.286    | 5 | 0.56  | 3.770     | 5 | 0.411 | 8.195     | 5 | 1.814 | 3.193     | 5 | 0.377 |
|       |          |   |       |          |   |       |           |   |       |           |   |       |           |   |       |           |   |       |
| group | SN ips   |   |       | SN con   |   |       | MThal ips |   |       | MThal con |   |       | VThal ips |   |       | VThal con |   |       |
|       | mean     | n | SEM   | mean     | n | SEM   | mean      | n | SEM   | mean      | n | SEM   | mean      | n | SEM   | mean      | n | SEM   |
| 2w    | 26.734   | 5 | 2.748 | 15.226   | 5 | 2.262 | 16.732    | 5 | 1.586 | 8.965     | 5 | 1.001 | 12.740    | 5 | 1.064 | 7.057     | 5 | 0.911 |
| 1m    | 23.953   | 4 | 2.576 | 12.880   | 4 | 2.018 | 17.387    | 3 | 1.526 | 9.512     | 3 | 1.036 | 14.319    | 3 | 1.667 | 8.090     | 3 | 1.05  |
| 3m    | 29.532   | 5 | 3.4   | 12.723   | 5 | 2.34  | 17.072    | 5 | 2.715 | 9.580     | 5 | 1.944 | 15.531    | 5 | 1.981 | 7.750     | 5 | 1.432 |
| 6m    | 25.204   | 5 | 3.82  | 14.904   | 5 | 2.643 | 18.693    | 5 | 2.521 | 12.166    | 5 | 2.226 | 15.027    | 5 | 2.488 | 9.129     | 5 | 1.594 |
| 9m    | 22.641   | 5 | 2.687 | 10.771   | 5 | 1.729 | 11.743    | 5 | 2.228 | 9.621     | 5 | 1.911 | 12.350    | 5 | 2.012 | 8.386     | 5 | 1.1   |
| 12m   | 12.235   | 5 | 0.434 | 5.174    | 5 | 0.611 | 7.156     | 5 | 0.858 | 4.519     | 5 | 0.633 | 6.449     | 5 | 1.035 | 3.764     | 5 | 0.528 |
|       |          |   |       |          |   |       |           |   |       |           |   |       |           |   |       |           |   |       |
| group | MC ips   |   |       | MC con   |   |       | Acb ips   |   |       | Acb con   |   |       | Pn ips    |   |       | Pn con    |   |       |
|       | mean     | n | SEM   | mean     | n | SEM   | mean      | n | SEM   | mean      | n | SEM   | mean      | n | SEM   | mean      | n | SEM   |
| 2w    | 15.391   | 5 | 1.154 | 11.646   | 5 | 1.332 | 18.234    | 5 | 2.403 | 5.767     | 5 | 0.768 | 16.666    | 5 | 1.595 | 15.841    | 5 | 1.251 |
| 1m    | 14.310   | 4 | 1.757 | 9.175    | 4 | 0.388 | 16.651    | 5 | 1.749 | 6.432     | 5 | 0.409 | 15.819    | 4 | 0.873 | 15.055    | 4 | 0.824 |
| 3m    | 12.223   | 5 | 0.832 | 10.011   | 5 | 1.63  | 19.791    | 4 | 2.815 | 7.041     | 4 | 1.134 | 14.573    | 5 | 1.833 | 13.842    | 5 | 1.331 |
| 6m    | 16.504   | 5 | 3.516 | 12.446   | 5 | 2.904 | 17.469    | 5 | 2.86  | 9.007     | 5 | 1.749 | 16.997    | 5 | 2.965 | 16.568    | 5 | 2.937 |
| 9m    | 13.338   | 5 | 2.052 | 10.615   | 5 | 1.683 | 12.145    | 5 | 1.921 | 6.628     | 5 | 1.172 | 13.988    | 5 | 1.46  | 13.337    | 5 | 1.219 |
| 12m   | 7.674    | 5 | 0.559 | 5.992    | 5 | 0.159 | 10.244    | 5 | 1.843 | 3.852     | 5 | 0.51  | 10.425    | 5 | 1.608 | 10.134    | 5 | 1.44  |
|       |          |   |       |          |   |       |           |   |       |           |   |       |           |   |       |           |   |       |
| group | VTA ips  |   |       | VTA con  |   |       | Hb ips    |   |       | Hb con    |   |       | Pir ips   |   |       | Pir con   |   |       |
|       | mean     | n | SEM   | mean     | n | SEM   | mean      | n | SEM   | mean      | n | SEM   | mean      | n | SEM   | mean      | n | SEM   |
| 2w    | 15.534   | 5 | 1.936 | 10.107   | 5 | 1.753 | 17.441    | 5 | 1.556 | 16.774    | 5 | 1.45  | 23.368    | 5 | 3.115 | 7.645     | 5 | 0.692 |
| 1m    | 11.112   | 4 | 1.619 | 7.518    | 4 | 1.124 | 17.012    | 3 | 1.539 | 16.520    | 3 | 2.262 | 19.556    | 4 | 1.398 | 9.526     | 4 | 0.573 |
| 3m    | 13.558   | 5 | 1.093 | 8.811    | 5 | 0.925 | 17.899    | 5 | 2.231 | 16.228    | 5 | 1.736 | 26.510    | 5 | 2.783 | 10.257    | 5 | 2.069 |
| 6m    | 13.302   | 5 | 2.062 | 9.911    | 5 | 1.739 | 20.092    | 5 | 3.717 | 18.696    | 5 | 3.274 | 19.335    | 5 | 2.802 | 10.399    | 5 | 1.736 |
| 9m    | 9.453    | 5 | 0.681 | 6.965    | 5 | 0.771 | 15.935    | 5 | 2.321 | 14.901    | 5 | 1.568 | 14.983    | 5 | 2.316 | 9.204     | 5 | 2.033 |
| 12m   | 4.969    | 5 | 0.37  | 4.170    | 5 | 0.288 | 9.655     | 5 | 1.916 | 9.238     | 5 | 2.119 | 10.880    | 5 | 1.029 | 5.923     | 5 | 0.784 |
|       |          |   |       |          |   |       |           |   |       |           |   |       |           |   |       |           |   |       |
| group | BLAm ips |   |       | BLAm con |   |       |           |   |       |           |   |       |           |   |       |           |   |       |
|       | mean     | n | SEM   | mean     | n | SEM   |           |   |       |           |   |       |           |   |       |           |   |       |
| 2w    | 17.311   | 5 | 1.132 | 11.152   | 5 | 1.543 |           |   |       |           |   |       |           |   |       |           |   |       |
| 1m    | 16.893   | 4 | 1.336 | 11.099   | 4 | 0.729 |           |   |       |           |   |       |           |   |       |           |   |       |
| 3m    | 20.142   | 5 | 2.915 | 9.220    | 5 | 1.89  |           |   |       |           |   |       |           |   |       |           |   |       |
| 6m    | 18.744   | 5 | 3.254 | 12.288   | 5 | 2.191 |           |   |       |           |   |       |           |   |       |           |   |       |
| 9m    | 15.441   | 4 | 2.499 | 10.180   | 4 | 1.21  |           |   |       |           |   |       |           |   |       |           |   |       |
| 12m   | 8.299    | 5 | 0.857 | 5.799    | 5 | 0.458 |           |   |       |           |   |       |           |   |       |           |   |       |

**Table S1.** This table, like Table 1 in the main part of the manuscript, shows the optical densities in %. This table is extended by the numbers of individuals (n) analysed for each time point and structure, as well as the standard error of mean (SEM) of each measurement. For more clarity, the table has been divided into 4 parts. The addition "ips" to the column name stands for ipsilateral (region to the injection side) and the addition “con” for contralateral (to the injection side). CPu: Caudate-Putamen complex, GP: Globus pallidus, EP: Entopeduncular nucleus, SN: Substantia nigra, MThal: Medial thalamic nuclei, VThal: Ventral thalamic nuclei, MC: Motor cortex, Acb: Accumbens nucleus, Pn: Pons, VTA: Ventral tegmental area, Hb: Habenular nuclei, Pir: Piriform cortex, BLAm: Basolateral amygdala nuclei.
